# Supplementary material
Source: publisher figshare collection journal article supplement (https://acs.figshare.com/ndownloader/files/4159963)
Supplement: Supplementary file 1 [file 4159963]

## **SUPPORTING INFORMATION**

### **Advanced solid-state NMR characterization of marine dissolved organic matter isolated using the coupled reverse osmosis/electrodialysis method**

Jingdong Mao<sup>1,\*</sup>, Xueqian Kong<sup>2</sup>, Klaus Schmidt-Rohr<sup>2</sup>, Joseph Pignatello<sup>3</sup>, and E. Michael Perdue<sup>4</sup>

<sup>1</sup>Department of Chemistry and Biochemistry, Old Dominion University, Norfolk, VA 23529

<sup>2</sup>Department of Chemistry, Gilman Hall, Iowa State University, Ames, IA 50010

<sup>3</sup>Department of Environmental Sciences, The Connecticut Agricultural Experiment Station, New Haven, CT 06504-1106

<sup>4</sup>School of Earth and Atmospheric Sciences, Georgia Institute of Technology, Atlanta, GA 30332

Number of pages: 5

## NMR Spectroscopy

*Quantitative  $^{13}\text{C}$  DP/MAS NMR.* Quantitative  $^{13}\text{C}$  direct polarization/magic angle spinning (DP/MAS) spectra were obtained at a spinning speed of 14 kHz. The  $90^\circ$   $^{13}\text{C}$  pulse-length was 4  $\mu\text{s}$ . Recycle delays were tested by the cross polarization/spin-lattice relaxation time/total sideband suppression (CP/ $T_1$ -TOSS) technique to make sure that all carbon sites were >95% relaxed.<sup>1</sup> Recycle delays were 80 s, and 1024 transients were averaged. In order to obtain quantitative information on the nonprotonated aromatic carbon fraction, DP/MAS  $^{13}\text{C}$  NMR with recoupled dipolar dephasing was used.<sup>2</sup> The dipolar dephasing time was 68  $\mu\text{s}$ .

*$^{13}\text{C}$  CP/TOSS and  $^{13}\text{C}$  CP/TOSS plus dipolar dephasing.* Qualitative compositional information was obtained with good sensitivity by  $^{13}\text{C}$  cross polarization/total sideband suppression (CP/TOSS) NMR experiments at a spinning speed of 6.5 kHz and a CP time of 1 ms, with a  $^1\text{H}$   $90^\circ$  pulse-length of 4  $\mu\text{s}$ . Four-pulse total suppression of sidebands (TOSS)<sup>3</sup> was employed before detection, and two-pulse phase-modulated (TPPM) decoupling was applied for optimum resolution. The corresponding sub-spectrum with signals of nonprotonated carbons and mobile groups like rotating  $\text{CH}_3$  was obtained by  $^{13}\text{C}$  CP/TOSS combined with 40- $\mu\text{s}$  dipolar dephasing. The number of scans was 30720.

*$^{13}\text{C}$  chemical-shift-anisotropy filter.* Because both anomeric carbons (O-C-O, e.g. in carbohydrate rings) and aromatic carbons may resonate between 120 and 90 ppm, the aromatic carbon signals were selectively suppressed by a five-pulse  $^{13}\text{C}$  chemical-shift-anisotropy (CSA) filter with a CSA-filter time of 35  $\mu\text{s}$  to clarify whether there are carbon signals of anomers overlapping with those of aromatics. The number of transients averaged for Coastal DOM was 6144, and more than 20,000 for Marine DOM. The details of this technique have been described elsewhere.<sup>1</sup>

*CH spectral editing.* For CH (methine) selection, the dipolar distortionless enhancement by polarization transfer (DEPT) method was used at a spinning speed of 4 kHz.<sup>4</sup> A 0.5 s  $^{13}\text{C}$   $T_1$ -filter was applied to reduce residual  $\text{CH}_3$  signals. The number of transients averaged was 71,680, with a recycle delay of 0.5 s. The details of this technique, which also suppresses mobile methylene signals, have been described elsewhere.<sup>4</sup>

*CH<sub>2</sub> Spectral Editing.* Spectral editing of  $\text{CH}_2$  signals was achieved by selection of the three-spin coherence of  $\text{CH}_2$  groups, using a  $^{13}\text{C}$   $90^\circ$  pulse and  $^1\text{H}$   $0^\circ/180^\circ$  pulses applied after the first quarter of one rotation period with MREV-8 decoupling.<sup>5</sup> The spinning speed was 5.787 kHz. The number of transients averaged was 73,728, with a recycle delay of 0.5 s.

*Spectral editing of immobile CH<sub>2</sub> + CH.* The combined spectrum of these functional groups was obtained with good sensitivity in a simple spectral-editing experiment. First, a  $^{13}\text{C}$  CP/TOSS spectrum is recorded using a short CP of 50  $\mu\text{s}$ . It shows predominantly protonated carbons in immobile segments, but residual peaks of quaternary carbons result from two-bond magnetization transfer. Second, a  $^{13}\text{C}$  CP/TOSS spectrum is recorded using a short CP of 50  $\mu\text{s}$  and 40  $\mu\text{s}$  dipolar dephasing. It contains only the residual signals of quaternary carbons or mobile segments (including  $\text{CH}_3$  groups with > 50% efficiency). The difference of the two spectra is the spectrum of immobile  $\text{CH}_2$  and CH carbons, with a small  $\text{CH}_3$  contribution.<sup>6</sup>

*$^1\text{H}$ - $^{13}\text{C}$  two-dimensional heteronuclear correlation (2D HETCOR) NMR and 2D HETCOR with dipolar dephasing.*  $^1\text{H}$ - $^{13}\text{C}$  2D HETCOR NMR experiments were performed at a spinning speed of 14 kHz. Lee-Goldburg cross polarization (LGCP) of 0.5 ms was used to suppress  $^1\text{H}$ - $^1\text{H}$  spin diffusion during polarization transfer, and the spectra show mostly one- and two-bond  $^1\text{H}$ - $^{13}\text{C}$  connectivities.<sup>7</sup> We used 128  $t_1$  increments of 5  $\mu\text{s}$ . In addition, 40  $\mu\text{s}$  dipolar

dephasing was inserted in the LGCP HETCOR to reveal multi-bond C-H connectivities for nonprotonated carbons. The number of scans was 131,072.

<sup>15</sup>N CP/MAS. <sup>15</sup>N CP/MAS NMR was conducted with a contact time of 1 ms, a recycle delay of 0.5 s, and at a spinning speed of 6.5 kHz. The number of transients averaged was 227,328 for Coastal DOM, and 460,800 for Marine DOM. The Hahn echo was employed before detection in order to refocus magnetization and avoid baseline distortion.<sup>8</sup>

Note that all <sup>13</sup>C spectra were referenced to external glycine COO signal at 176.49 ppm and the <sup>15</sup>N chemical shifts were referred to NH<sub>3</sub> using the signal of N-acetyl-valine at 122 ppm as a secondary reference. In addition, Gaussian broadening and only constant phase correction were applied so that no baseline correction was necessary.

## REFERENCES

1. Mao, J.-D.; Schmidt-Rohr, K. Separation of aromatic-carbon  $^{13}\text{C}$  NMR signals from di-oxygenated alkyl bands by a chemical-shift-anisotropy filter. *Solid State Nucl. Magn. Reson.* **2004**, *26*, 36-45.
2. Mao, J.-D.; Schmidt-Rohr, K. Accurate quantification of aromaticity and nonprotonated aromatic carbon fraction in natural organic matter by  $^{13}\text{C}$  solid-state nuclear magnetic resonance. *Environ. Sci. Technol.* **2004**, *38*, 2680-2684.
3. Dixon, W. T. NMR spectra in spinning sidebands (TOSS). *J. Chem. Phys.* **1982**, *77*, 1800-1809.
4. Schmidt-Rohr, K.; Mao, J.-D. Efficient CH-group selection and identification in  $^{13}\text{C}$  solid-state NMR by dipolar DEPT and  $^1\text{H}$  chemical-shift filtering. *JACS* **2002**, *124*, 13938-13948.
5. Mao, J.-D.; Schmidt-Rohr, K. Methylene spectral editing in solid-state NMR by three-spin coherence selection. *J. Magn. Reson.* **2005**, *176*, 1-6.
6. Mao, J.-D.; Fang, X.; Lan, Y.; Schimmelmann, A.; Mastalerz, M.; Xu, L.; Schmidt-Rohr, K. Chemical and nanometer-scale structures of kerogen and their changes during thermal maturation investigated by advanced solid-state NMR spectroscopy. *Geochim. Cosmochim. Acta* **2010**, *74*, 2110-2127.
7. Mao, J.-D.; Schmidt-Rohr, K. Absence of mobile carbohydrate domains in dry humic substances proven by NMR, and implications for organic - Contaminant sorption models. *Environ. Sci. Technol.* **2006**, *40*, 1751-1756.
8. Mao, J.-D.; Cory, R. M.; McKnight, D. M.; Schmidt-Rohr, K. Characterization of a nitrogen-rich fulvic acid and its precursor algae by solid-state NMR. *Org. Geochem.* **2007**, *38*, 1277-1292.
